# Supplementary material for: Eliminating interference by anthocyanin in chlorophyll estimation of sweet potato (Ipomoea batatas L.) leaves
Source: PubMed Central journal article supplement (PMC5432896; doi:10.1186/1999-3110-55-11), 2014-01-30

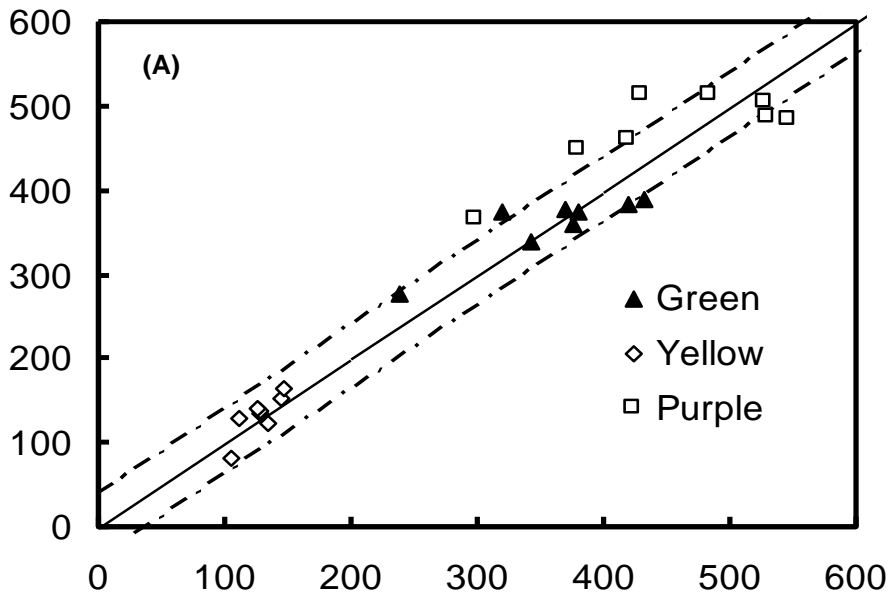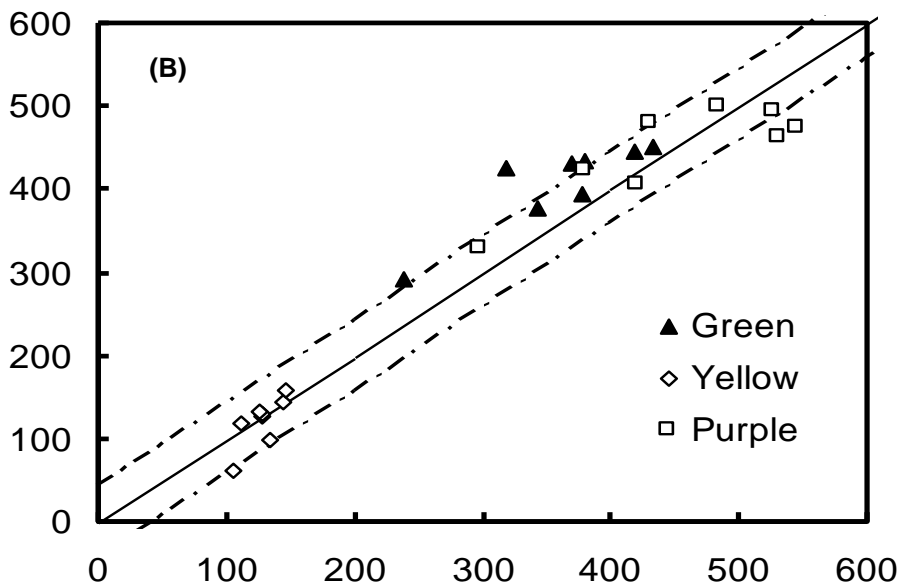

Supplement: 40529_2013_66_MOESM7_ESM.pdf [file 40529_2013_66_MOESM7_ESM.pdf]
